# Supplementary material for: An ultrafast-temporally-responsive flexible photodetector with high sensitivity based on high-crystallinity organic–inorganic perovskite nanoflake
Source: Royal Society of Chemistry journal article supplement (doi:10.1039/c7nr04395c), 2017-01-01
Supplement: c7nr04395c1.pdf [file c7nr04395c1.pdf]

## Supporting Information

### Ultrafast-temporal-responsive flexible photodetector with high sensitivity based on high-crystallinity 2D organic-inorganic perovskite

Wei Zheng, Richeng Lin, Zhaojun Zhang, Qixian Liao, Jiajun Liu and Feng Huang\*

\*Corresponding author: [huangfeng@mail.sysu.edu.cn](mailto:huangfeng@mail.sysu.edu.cn)

#### Derivation

Derivation of the relationship between responsivity ( $R_\lambda$ ) and surface-recombination-velocity ( $s$ ) is conducted. At first, the equation of responsivity and optical gain is cited from a previous report:<sup>1</sup>

$$R_\lambda = \frac{\eta(\lambda)G(\lambda)e\lambda}{1 + \frac{2s}{L}}, \quad (1)$$

where  $\lambda$  is excited light wavelength,  $\eta(\lambda)$  is efficiency of light absorption,  $G(\lambda)$  is optical gain,  $e$  is electronic charge,  $h$  is planck constant, and  $c$  is velocity of light. The optical gain can be written as:<sup>2</sup>

$$G(\lambda) = \frac{\tau_{eff}}{\tau_t}, \quad (2)$$

where  $\tau_{eff}$  is effective lifetime of carriers, and  $\tau_t$  is transit time, expressed as:  $1/\tau_t = \mu V/L^2$ .

For 2D structure, the  $\tau_{eff}$  can be expressed as:<sup>3</sup>

$$\frac{1}{\tau_{eff}} = \frac{1}{\tau_b} + \frac{2s}{L}, \quad (3)$$

where  $\tau_b$  is bulk carrier lifetime, and  $L$  is length of the material. Substituting Equations (2) and (3) into (1), the responsivity can be written as:

$$R_\lambda = \frac{1}{\frac{1}{\mu\tau_b} + \frac{2s}{\mu L}} \cdot \frac{e\eta\lambda V}{hcL^2}, \quad (4)$$

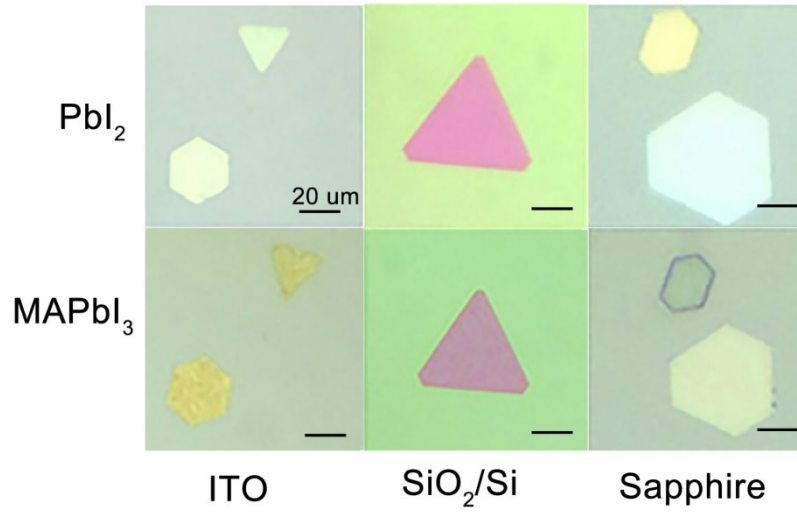

**Figure S1.** Optical images of 2D  $\text{MAPbI}_3$  and  $\text{PbI}_2$  precursors on ITO,  $\text{SiO}_2/\text{Si}$  and sapphire substrates, indicating low restriction of the substrates.

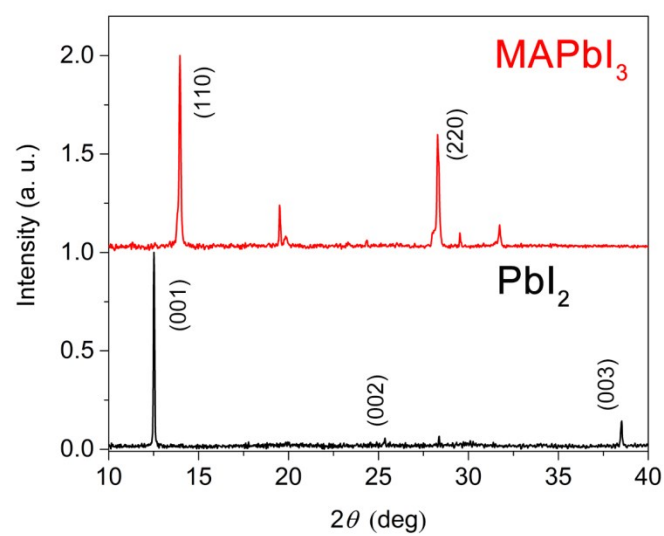

**Figure S2.** XRD patterns of 2D MAPbI<sub>3</sub> (red line) and PbI<sub>2</sub> precursor (black line). The differences of the XRD spectra between 2D layered PbI<sub>2</sub> precursor and MAPbI<sub>3</sub> indicate that hexagonal layered PbI<sub>2</sub> precursor has transformed to tetragonal MAPbI<sub>3</sub> structure.

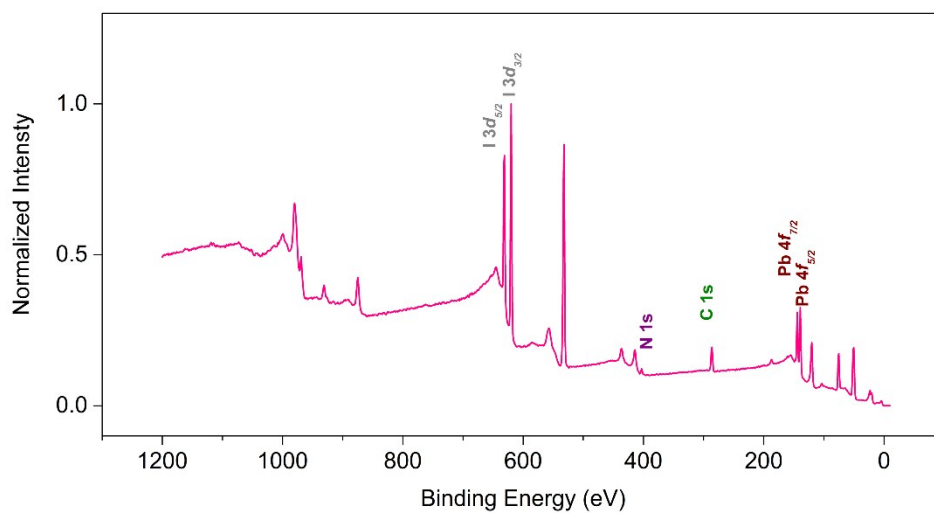

**Figure S3.** XPS of as-grown 2D MAPbI<sub>3</sub>. The characteristic peaks of Pb 4*f*, C 1*s*, N 1*s* and I 3*d* are pointed out, which are discussed in the manuscript.

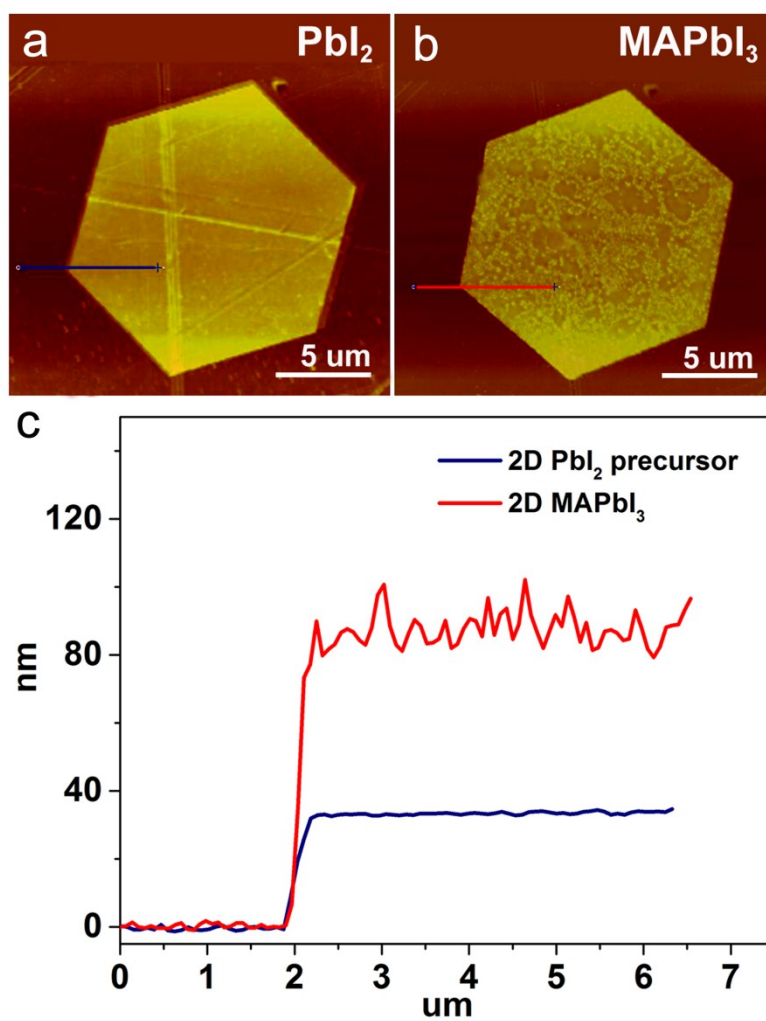

**Figure S4.** (a) and (b) show AFM images of the 2D layered  $\text{PbI}_2$  precursor and corresponding 2D  $\text{MAPbI}_3$  crystal after gas reaction, respectively. (c) Thicknesses of the samples shown in (a) and (b) exhibit obvious variation.

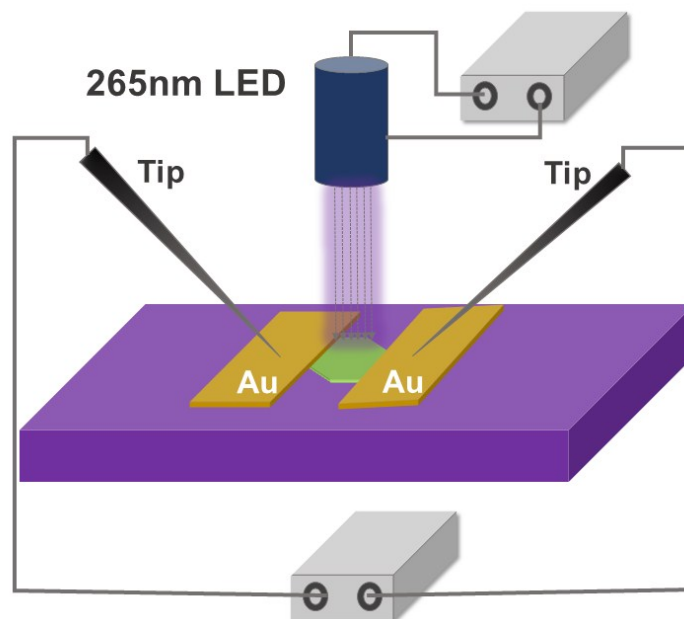

**Figure S5.** A typical schematic diagram of the electric measurement system, including two tips contacting Au electrodes, a sourcemeter to measure I-V curve and a source to modulate the 265 nm LED light.

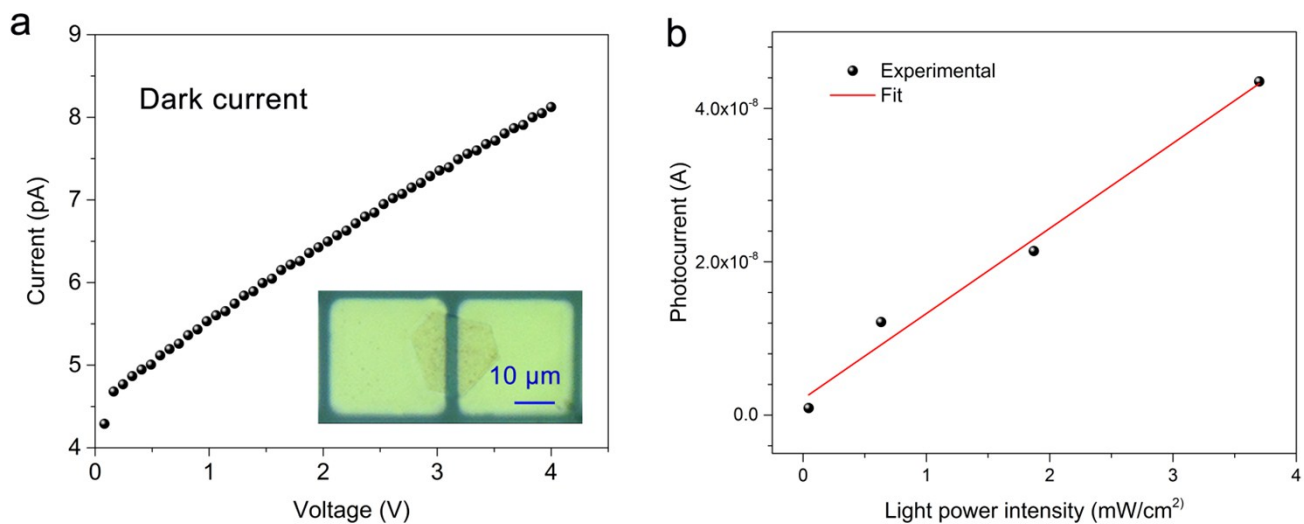

**Figure S6.** (a) Dark current of the present detector. The inset is corresponding optical photo. (b) Photocurrent as a function of illumination intensity shows a linear increase with increasing illumination intensity, demonstrating a typical photoconductive effect.

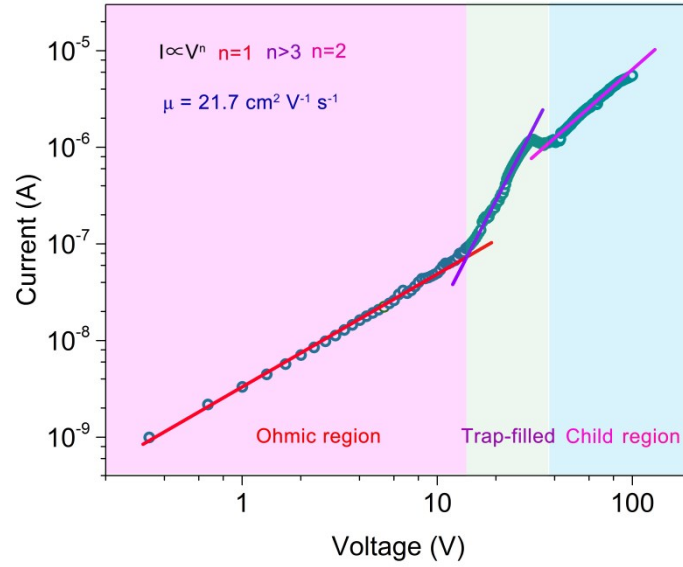

**Figure S7.** I-V characteristic of bulk MAPbI<sub>3</sub> single crystal with a size of 2mm(length) × 2mm(width) × 0.5mm(thickness) synthesized via typical inverse temperature crystallization. The I-V characteristic analyzed by space charge limit current effect shows an ohmic region, a trap-filled region and a Child region. The carrier mobility of MAPbI<sub>3</sub> can be fitted via the equation:  $I=9\varepsilon\varepsilon_0\mu V^2/8L$ , where  $\varepsilon$  is dielectric constant of the material,  $\varepsilon_0$  is vacuum dielectric constant, L is length of the material, and the extracted  $\mu=21.7 \text{ cm}^2\text{V}^{-1}\text{s}^{-1}$ .



## References

1. Saran, R. & Curry, R. J. Lead sulphide nanocrystal photodetector technologies. *Nat. Photon.* **10**, 81-92 (2016).
  2. Neamen, D. A. *Semiconductor Physics and Devices: Basic Principles*. McGraw-Hill, Beijing (2003).
  3. Demichel, O. *et al.* Surface Recombination Velocity Measurements of Efficiently Passivated Gold-Catalyzed Silicon Nanowires by a New Optical Method. *Nano Lett.* **10**, 2323-2329 (2010).
-
